# Supplementary material
Source: Royal Society of Chemistry journal article supplement (doi:10.1039/d6cp01354f)
Supplement: d6cp01354f1.pdf [file d6cp01354f1.pdf]

# Synergistic Modulation of Composite Donors and $\pi$ -Spacers in Porphyrin Sensitizers for Enhanced Charge Transfer and Photovoltaic Efficiency: A DFT/TD-DFT Study

Nan Yang<sup>a</sup>, Dongsheng Liu<sup>a</sup>, Haoran Ma<sup>a</sup>, Yongchun Li<sup>a</sup>, Siyi Wang<sup>a</sup>, Bumaliya Abulimiti<sup>a\*</sup>, Mei Xiang<sup>a\*</sup>, Xiaoning Wang<sup>a</sup>

a. Xinjiang Key Laboratory for Luminescence Minerals and Optical Functional Materials, School of Physics and Electronic Engineering, Xinjiang Normal University, Urumqi 830054, China.

† E-mail: maryam917@163.com (Bumaliya Abulimiti); mei811014@126.com (Mei Xiang)

**Table S1** Information on the structure, energy levels, and adsorption energy of dye molecules after adsorption onto  $(\text{TiO}_2)_{24}$

| Dye                         | Ti–O <sub>a</sub> (Å) | Ti–O <sub>b</sub> (Å) | HOMO (eV) | LUMO (eV) | E <sub>g</sub> (eV) | E <sub>ads</sub> (eV) |
|-----------------------------|-----------------------|-----------------------|-----------|-----------|---------------------|-----------------------|
| L- $(\text{TiO}_2)_{24}$    | 2.12                  | 2.17                  | -5.10     | -3.34     | 1.77                | -2.99                 |
| T- $(\text{TiO}_2)_{24}$    | 2.09                  | 2.19                  | -5.23     | -3.52     | 1.70                | -2.72                 |
| T-L- $(\text{TiO}_2)_{24}$  | 2.17                  | 2.09                  | -5.33     | -3.48     | 1.85                | -3.54                 |
| TO-L- $(\text{TiO}_2)_{24}$ | 2.03                  | 2.17                  | -4.82     | -3.35     | 1.47                | -2.45                 |
| T-LD- $(\text{TiO}_2)_{24}$ | 2.11                  | 2.25                  | -5.14     | -3.58     | 1.56                | -2.72                 |

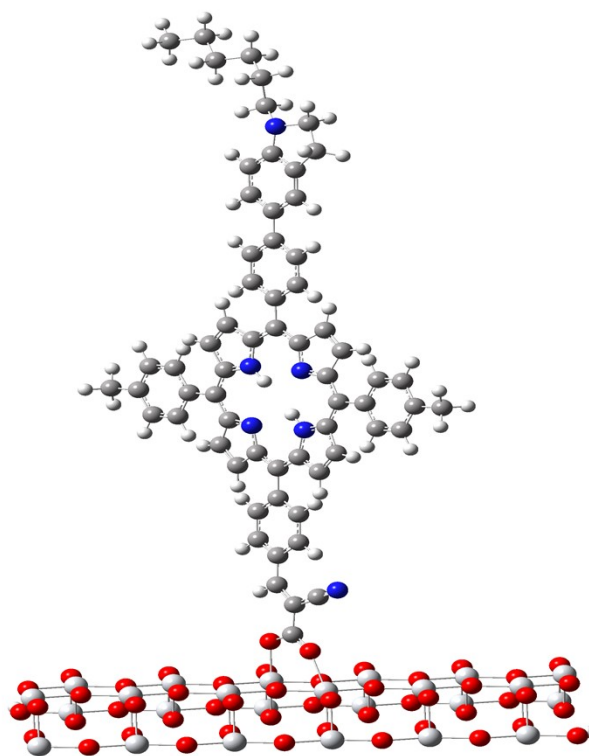

**Fig. S1** Dye molecules adsorbed on the  $(\text{TiO}_2)_{24}$  cluster model.

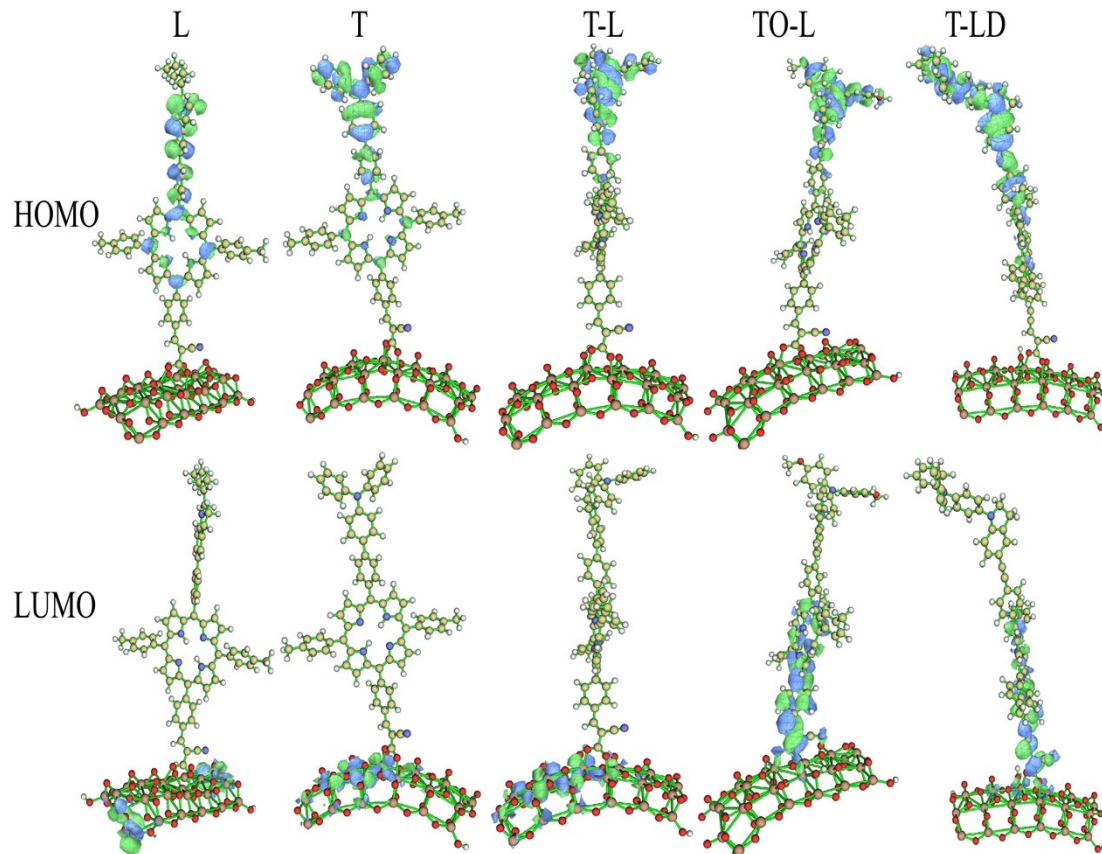

**Fig. S2** Molecular orbital distributions of selected dye-(TiO<sub>2</sub>)<sub>24</sub> complexes.

**Table S 2** The conduction-band minimum energy ( $E_{\text{CBM}}$ ), electron-injection distance ( $r_{\text{in}}$ ), electron-recombination distance ( $r_{\text{re}}$ ), injection driving force after conduction-band shift ( $\Delta G^0$ ), electron-injection rate ( $K_{\text{inj}}$ ), injection efficiency ( $\varphi_{\text{in}}$ ), and charge-collection efficiency ( $\eta_{\text{coll}}$ ) of the five dye-(TiO<sub>2</sub>)<sub>24</sub> composite systems.

| Dye                                    | $E_{\text{CBM}}$ (eV) | $r_{\text{in}}$ (Å) | $r_{\text{re}}$ (Å) | $\Delta G^0$ (eV) | $K_{\text{inj}}$ (s <sup>-1</sup> ) | $\varphi_{\text{in}}$ | $\eta_{\text{coll}}$ |
|----------------------------------------|-----------------------|---------------------|---------------------|-------------------|-------------------------------------|-----------------------|----------------------|
| L-(TiO <sub>2</sub> ) <sub>24</sub>    | -3.74                 | 4.40                | 28.41               | 0.86              | $1.76 \times 10^{14}$               | 0.9994                | 1                    |
| T-(TiO <sub>2</sub> ) <sub>24</sub>    | -3.55                 | 4.37                | 28.16               | 0.65              | $7.60 \times 10^{14}$               | 0.9999                | 1                    |
| T-L-(TiO <sub>2</sub> ) <sub>24</sub>  | -3.53                 | 4.36                | 34.17               | 0.63              | $3.63 \times 10^{14}$               | 0.9997                | 1                    |
| TO-L-(TiO <sub>2</sub> ) <sub>24</sub> | -3.61                 | 4.20                | 36.14               | 0.73              | $1.25 \times 10^{14}$               | 0.9992                | 1                    |
| T-LD-(TiO <sub>2</sub> ) <sub>24</sub> | -3.60                 | 4.38                | 40.30               | 0.28              | $1.23 \times 10^{14}$               | 0.9992                | 1                    |

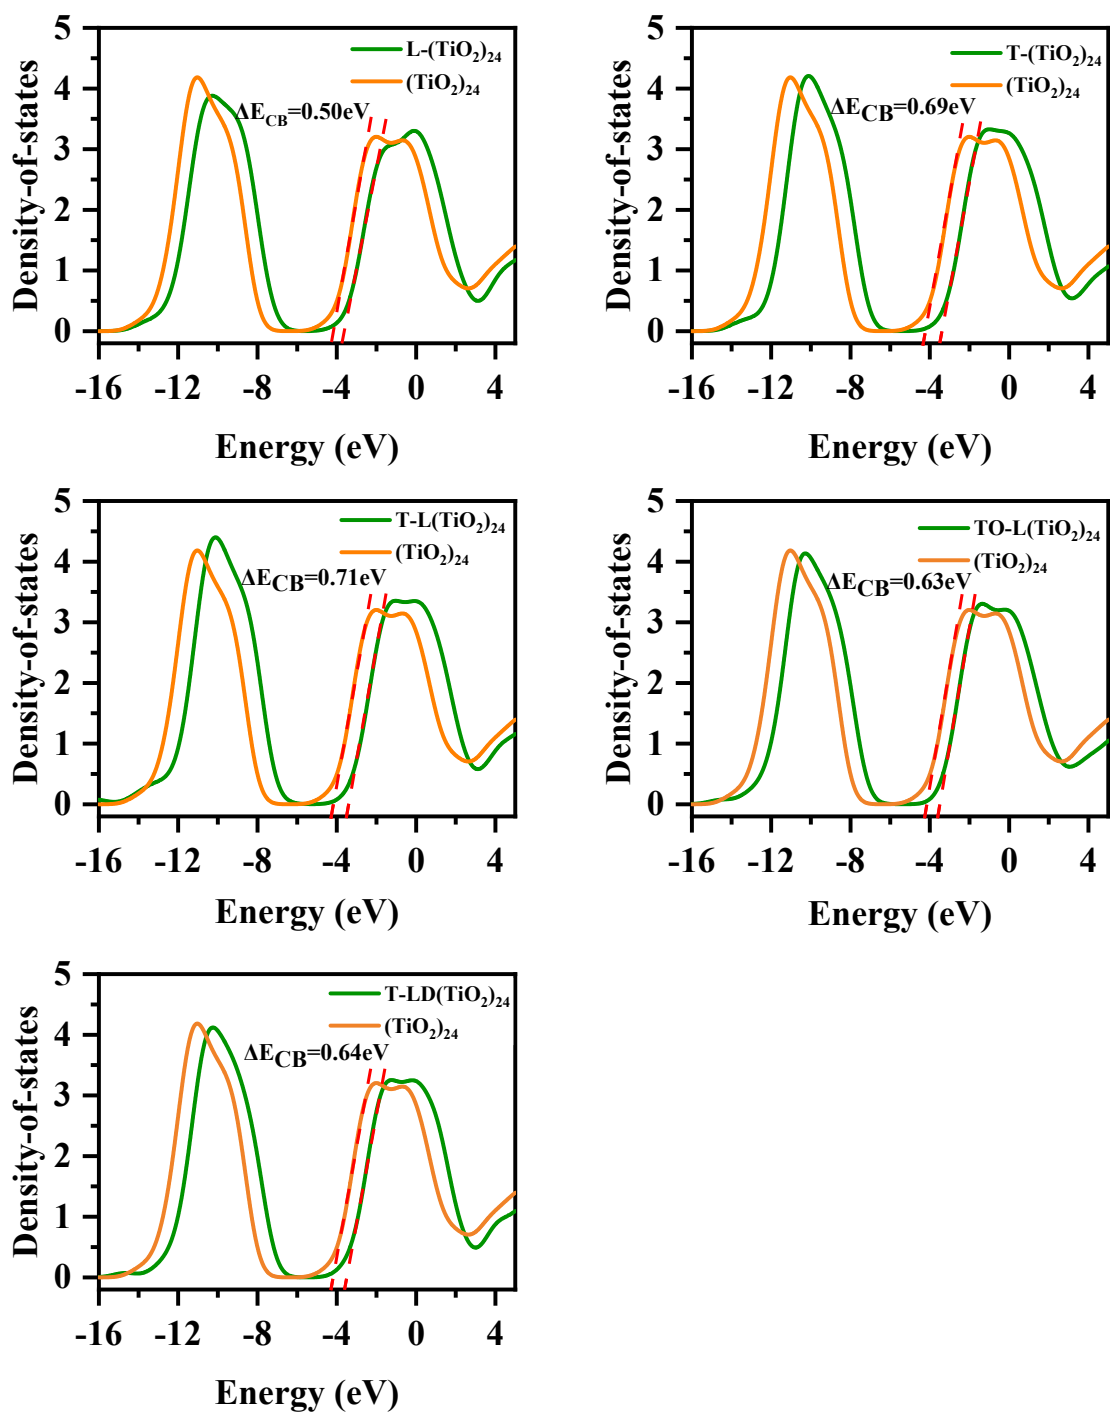

Fig. S3 A schematic illustration of the dye-TiO<sub>2</sub> interaction and the resulting conduction-band minimum shift ( $\Delta E_{CB}$ ) derived from the PDOS analysis.
